# Supplementary material
Source: HighWire-hosted journal article supplement (https://cmajopen.ca/highwire/filestream/85273/field_highwire_adjunct_files/1/2020-0186-2-at.pdf)
Supplement: 2020-0186-2-at.pdf [file 2020-0186-2-at.pdf]

Supplementary table 1: Weighted multivariable logistic regression analysis for factors associated with CRMU among non-elderly participants (<65 years):

| Factors                      | OR (95% CI)      |
|------------------------------|------------------|
| Working status last week     |                  |
| Worked at a job/business     | Reference        |
| Absent from work             | 0.64 (0.30-1.38) |
| Did not have a job           | 1.04 (0.65-1.66) |
| Sex                          |                  |
| Females                      | Reference        |
| Males                        | 0.63 (0.40-0.99) |
| Racial background            |                  |
| White                        | Reference        |
| Indigenous                   | 2.52 (1.47-4.31) |
| Others                       | 1.06 (0.53-2.12) |
| Marital status               |                  |
| Married                      | Reference        |
| Unmarried                    | 1.75 (1.10-2.78) |
| Self-perceived health        |                  |
| Poor                         | Reference        |
| Excellent                    | 0.43 (0.15-1.18) |
| Very good                    | 0.28 (0.11-0.71) |
| Good                         | 0.73 (0.35-1.49) |
| Fair                         | 1.09 (0.55-2.14) |
| Self-perceived mental health |                  |
| Poor                         | Reference        |
| Excellent                    | 0.92 (0.31-2.70) |
| Very good                    | 1.79 (0.58-5.48) |
| Good                         | 1.83 (0.68-4.91) |
| Fair                         | 2.16 (0.80-5.79) |
| Total household income       |                  |
| ≥80,000                      | Reference        |
| <20,000                      | 2.82 (1.48-5.37) |

Appendix 2, as supplied by the authors. Appendix to: Abdel-Rahman O, North S. Patterns of cost-related medication underuse among Canadian adults with cancer: a cross-sectional study using survey data. *CMAJ Open* 2021. DOI:10.9778/cmajo.20200186. Copyright © 2021 The Author(s) or their employer(s). To receive this resource in an accessible format, please contact us at [cmajgroup@cmaj.ca](mailto:cmajgroup@cmaj.ca).

|                                        |                  |
|----------------------------------------|------------------|
| 20,000- <40,000                        | 4.02 (2.22-7.27) |
| 40,000- <60,000                        | 2.33 (1.29-4.21) |
| 60,000- <80,000                        | 1.98 (0.89-4.37) |
| Education                              |                  |
| Post-secondary education               | Reference        |
| Less than secondary school             | 0.60 (0.33-1.10) |
| Secondary school                       | 0.77 (0.48-1.24) |
| Insurance for prescription medications |                  |
| Yes                                    | Reference        |
| No                                     | 3.14 (2.00-4.95) |
